# Supplementary material for: Reversible morphology transitions of supramolecular polymer self-assemblies for switch-controlled drug release
Source: Royal Society of Chemistry journal article supplement (doi:10.1039/c5cc05579b), 2015-01-01
Supplement: c5cc05579b1.pdf [file c5cc05579b1.pdf]

**Supporting Information for**

**Reversible morphology transitions of supramolecular polymer self-assemblies for switch-controlled drug release**

Haitao Zhang , Xiaodong Fan\*, Wanbin Zhang, RongtianSuo, Zhen Yang, Hui Li, Yang Bai, Hao Yao, Wei Tian\*

The Key Laboratory of Space Applied Physics and Chemistry, Ministry of Education and Shaanxi Key Laboratory of Macromolecular Science and Technology, School of Science, Northwestern Polytechnical University, Xi'an, 710072, P. R. China

**Table of Contents**

- 1. Materials and methods**
- 2. Synthesis and characterization of P1**
- 3. Synthesis and characterization of P2**
- 4. Preparation method of SBCP**
- 5. Dissociation process of SBCP**
- 6. Formation of SBCP self-assemblies**
- 7. The influence of UV light irradiation on the reversible morphology transitions of SBCP self-assemblies**
- 8. Drug loading and vitro release**
- 9. Reference**

## 1. Materials and Methods

### 1.1 Materials

Mono-6-deoxy-6-alkyne- $\beta$ -cyclodextrin ( $\beta$ -CD-C $\equiv$ CH) and bis (2-azidoethyl) amine (EA-(N<sub>3</sub>)<sub>2</sub>) were synthesized according to the methods reported in the literature,<sup>[1, 2]</sup> Polyethylene glycol (PEG M<sub>w</sub>=2000), Methoxypolyethylene glycols (mPEG, M<sub>n</sub>=1500) and Aminoazobenzol(AZO, 99%,) were purchased from ACROS Chemical Industries (USA).N,N,N', N, N-pentamethyldiehylenetriamine (PMDETA) was supplied by Yutian Chemical (Liyang City, China) and used as received without further purification, copper (I) bromide (CuBr, 98%), 2-(Diethyl amino)-ethyl methacrylate (DEAEMA, 99%) and Succinic anhydride(98%) were purchased from Aldrich. Doxorubicin hydrochloride (DOX·HCl, 99%) was purchased from Sigma. Dimethylformamide (DMF) and Acetone were dried over 4A molecular sieve prior to use. All other reagents were purchased from Sinopharm Chemical Reagent Co. and used as received.

### 1.2 Methods

<sup>1</sup>H-NMR was recorded on a Bruker-Avance III NMR spectrometer (400 MHz) with dimethyl sulfoxide-*d*<sub>6</sub> (DMSO-*d*<sub>6</sub>) and pH 7.4 and 6.0 D<sub>2</sub>O as solvents. The 2D <sup>1</sup>H-NMR NOESY spectra were recorded on a Bruker-Avance III NMR spectrometer (400 MHz) with pH 6.0 D<sub>2</sub>O as solvents. An isothermal titration calorimeter (ITC; Micro Cal Inc., U.S.A.) has been used for determining from a single titration curve simultaneously the enthalpy of the interaction between benzophenone and cyclodextrin in their native or polymerized form and the equilibrium constant corresponding to the formation of a complex between those species.<sup>[7]</sup> The FT-IR spectra were obtained on a Nicolet iS10 spectrometer (Nicolet) casting samples into thin films on KBr. Transition mode was used and the wavenumber range was set from 4000 cm<sup>-1</sup> to 500 cm<sup>-1</sup>. UV-vis spectrophotometer measurement was performed on Shimadzu UV-2550 model spectroscopy (Shimadzu, Japan). Particle size was measured by Zetasizer Nano-ZS dynamic light scattering (DLS) (Malvern Instruments, UK), Each sample was kept at a predetermined temperature for 3 min before measurement without any filter. Slight light scattering (SLS) analysis was performed on a DAWN HELEOS-II multi-angle light scattering detector (Wyatt Technology Corporation, USA) operated at 665 nm, using Gallium-arsenic as incident laser beam source. SLS data were collected at 6 different concentrations of the aggregates and 18 different angles for each concentration. The data were analyzed using the Zimm plot method

on HELEOS- II Firmware 2.4.0.4 Advanced software to determine  $R_g$ . TEM was performed on JEM-2010 microscope (Japan) with an electron kinetic energy of 300 keV. The samples were prepared by aspirating the brush supermolecular block copolymer solution (2 mg/mL) on to the carbon-coated copper grids at the same setting time. Excessive solution was adsorbed away with filter paper after 10 min, and then the samples were measured without any negative staining.

## 2 Synthesis and Characterization of P1

In this study, poly((diethylamino) ethyl-methacrylate)-*b*-polyethylene glycol-*b*-poly((diethylamino)ethyl-methacrylate) bearing two  $\beta$ -CD at every terminal [ $(\beta\text{-CD})_2$ -*g*-(PDEA-*b*-PEG-*b*-PDEA)-*g*-( $\beta\text{-CD})_2$ , P1] was first designed and synthesized. The structure and synthetic route of the triblock polymer are shown in Scheme S1.

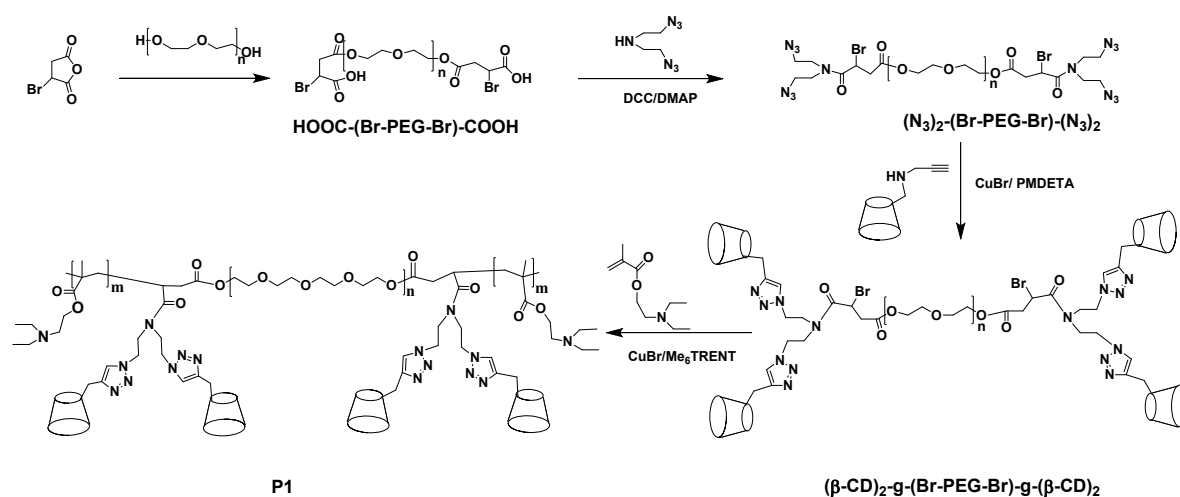

Scheme S1 Synthesis of P1

### 2.1 Synthesis of two bromosuccinic acid modified Polyethylene glycol macroinitiator HOOC-(Br-PEG-Br)-COOH

HOOC-(Br-PEG-Br)-COOH was synthesized according to the literature [3] with some change. Typically, PEG ( $M_w = 2000$ , 2.0 g, 1.0 mmol) and bromosuccinic anhydride (0.72 g, 4 mmol) were dissolved in 1,4-dioxane (8 mL) and DMAP (240 mg, 2.0 mmol) for 24 h under nitrogen gas at room temperature. The polymer solution was then filtered and precipitated in ether. The white precipitate was dissolved in dichloromethane (40 mL) and washed with 10% HCl (3 × 30 mL) and brine (3 × 30 mL). The organic layer was dried with anhydrous  $\text{MgSO}_4$  overnight. The solution was filtered, precipitated in ether/hexane (1/2) and dried by vacuum at 25 °C. A white powder (1.14 g, 57% yield) was obtained. FT-IR (Figure S1 A)  $\nu_{\text{max}} = 1720 \text{ cm}^{-1}$  (-COO-),  $2884 \text{ cm}^{-1}$  ( $\text{CH}_2$ );  $^1\text{H-NMR}$  (Figure S2

A) (400 MHz, DMSO, room temperature, TMS)  $\delta$  (ppm): 3.31-3.87 (-OCH<sub>2</sub>O-), 4.21 (-CH<sub>2</sub>-COOH), 4.73 (-BrCH-).

## 2.2 Synthesis of two bis (2-azidoethyl) amine ended Polyethylene glycol macroinitiator (N<sub>3</sub>)<sub>2</sub>-(Br-PEG-Br)-(N<sub>3</sub>)<sub>2</sub>

HOOC-(Br-PEG-Br)-COOH (0.472 g, 0.2 mmol) and bis (2-azidoethyl) amine (EA-(N<sub>3</sub>)<sub>2</sub>) (0.124 g, 0.8 mmol) were dissolved in 6 ml DMF and treated with DCC (0.164 g, 0.8 mmol) and DMAP (0.049 g, 0.4 mmol) for 24 h at room temperature. Then dicyclohexylurea was filtered out and the polymer was precipitated in ether, filtered and washed with methanol. The polymer was dried using a vacuum at 20 °C for 24 h to give a white powder (0.45 g, 50% yield). FT-IR (Figure S1B)  $\nu_{\max}$  = 1720 cm<sup>-1</sup> (-COO-), 2884 cm<sup>-1</sup> (CH<sub>2</sub>); 1647 cm<sup>-1</sup> (-CON-); 2100 cm<sup>-1</sup> (N<sub>3</sub>), <sup>1</sup>H-NMR (Figure S2B) (400 MHz, DMSO, room temperature, TMS)  $\delta$  (ppm): 3.31-3.87 (-OCH<sub>2</sub>O-), 4.21 (-CH<sub>2</sub>-COOH), 4.73 (-BrCH-), 2.96 ppm (CH<sub>2</sub>-N<sub>3</sub>).

## 2.3 Synthesis of two $\beta$ -CD modified polyethylene glycol macroinitiator ( $\beta$ -CD)<sub>2</sub>-g-(Br-PEG-Br)-g-( $\beta$ -CD)<sub>2</sub>

( $\beta$ -CD)<sub>2</sub>-g-(Br-PEG-Br)-g-( $\beta$ -CD)<sub>2</sub> was prepared via the click reaction of (N<sub>3</sub>)<sub>2</sub>-(Br-PEG-Br)-(N<sub>3</sub>)<sub>2</sub> with a slight excess of  $\beta$ -CD-C $\equiv$ CH, and a typical procedure was as follows. To a Schlenk tube equipped with a magnetic stirring bar, (N<sub>3</sub>)<sub>2</sub>-(Br-PEG-Br)-(N<sub>3</sub>)<sub>2</sub> (0.519 g, 0.2 mmol), PMDETA (0.747 g, 4.31 mmol),  $\beta$ -CD-C $\equiv$ CH (1.28 g, 1.20 mmol) and DMF (5 mL) were added. After one brief freeze-thaw cycle, CuCl (0.119 g, 1.20 mmol) was introduced under the protection of N<sub>2</sub> flow. The reaction tube was carefully degassed by three freeze-pump-thaw cycles, sealed under a vacuum, and the mixture was then stirred at 50 °C for 24 h. The reaction mixture was then exposed to air and precipitated into ether four times to obtain the white solid. The crude product was dissolved in 5 mL DMF, enclosed in dialysis membrane (MWCO 2000 Da), and then purified by dialyzing in deionized water for 48 h to remove the excess  $\beta$ -CD-C $\equiv$ CH. After removal of the water by freeze drying, a white powder was obtained (0.511 g, yield: 35.1%). <sup>1</sup>H NMR (Figure S2C) (400 MHz, DMSO-*d*<sub>6</sub>, room temperature, TMS),  $\delta$  (ppm): 7.92 (s, 1) of 1,2,3-triazole ring; 5.75 (7,8-H), 4.83 (1-H), 4.47 (9-H), 3.64 (3,5-H), 3.39 (2,4-H) of  $\beta$ -CD; 3.31-3.8 (-CH<sub>2</sub>O-) of PEG.

## 2.4 Synthesis of P1

P1 was synthesized by the atom transfer radical polymerization (ATRP) reaction of DEA

monomer using  $(\beta\text{-CD})_2\text{-g-(Br-PEG-Br)-g-(}\beta\text{-CD)}_2$  as the macroinitiator. In a typical example, DEA monomer (1.95 g, 1.5 mmol), PMDETA (3.46 mg, 0.02 mmol),  $(\beta\text{-CD})_2\text{-g-(Br-PEG-Br)-g-(}\beta\text{-CD)}_2$  (728.3 mg, 0.01 mmol), and 6 mL DMF were charged into a reaction flask. The flask was capped with a rubber plug and purged with pure nitrogen for 30 min. CuBr (0.0864 g, 0.06 mmol) was then introduced under protection of  $\text{N}_2$  flow to start the polymerization at 30 °C under a nitrogen atmosphere. After 5 h, the reaction mixture was then exposed to air and diluted with THF. The copper catalyst was removed by passing the solution through alumina. The polymer was obtained from the resulting reaction mixture by addition to cold diethyl ether to precipitate the solids which were filtered and dried under high vacuum at room temperature for 12 h. The isolated polymer was reprecipitated from THF into cold diethyl ether three times and dried under vacuum at 25 °C for 24 h, a pale powder was obtained (1.03 g, yield: 38.1%).  $^1\text{H NMR}$  (Figure S2D) (400 MHz,  $\text{DMSO-}d_6$ , room temperature, TMS),  $\delta$  (ppm): 7.92 (s, 1) of 1,2,3-triazole ring; 5.75 (7,8-H), 4.83 (1-H), 4.47 (9-H), 3.64 (3,5-H), 3.39 (2,4-H) of  $\beta\text{-CD}$ ; 3.31-3.8 (- $\text{CH}_2\text{O-}$ ) of PEG; 4.27 (O- $\text{CH}_2$ ), 3.48 (N- $\text{CH}_2\text{-CH}_2$ ), 3.20 (N- $\text{CH}_2\text{-CH}_3$ ), 1.5-0.9 (- $\text{CH}_3$ ) of PDEA.  $M_{w,\text{SEC}}=22950$ ,  $M_w/M_n=1.27$ .

## 2.5 Characterization of P1

The structure and synthetic route of P1 was shown in Scheme S1. ATRP polymerization has frequently been used to prepare block copolymers as drug delivery systems due to the good control over polymerization of various monomers.<sup>[3]</sup> In the current work, P1 was prepared via ATRP reaction of DEA using as the macroinitiator  $(\beta\text{-CD})_2\text{-g-(Br-PEG-Br)-g-(}\beta\text{-CD)}_2$  which was synthesized through the click reaction of four azide groups in  $(\text{N}_3)_2\text{-(Br-PEG-Br)-}(\text{N}_3)_2$  and excessive mono-6-deoxy-6-alkyne ( $\beta\text{-CD-C}\equiv\text{CH}$ ) monomers in the presence of copper (I) bromide (CuBr)/1,1,4,7,7-pentamethyldiethylenetriamine (PMDETA). The compound of  $(\text{N}_3)_2\text{-(Br-PEG-Br)-}(\text{N}_3)_2$  was prepared via the amidation reaction between  $\text{HOOC-(Br-PEG-Br)-COOH}$  and bis-(azidoethyl)-amine ( $\text{EA-(N}_3)_2$ ),  $\text{HOOC-(Br-PEG-Br)-COOH}$  was synthesized through the esterification reaction between HO-PEG-OH and excessive bromosuccinic anhydride. These copolymers were successfully synthesized and confirmed by FT-IR (Figure S1),  $^1\text{H NMR}$  (Figure S2) and SEC-MALLS (Figure S3). The polymerization results are listed in Table S1. It can be seen that the molecular weight ( $M_w$ ) of  $(\beta\text{-CD})_2\text{-g-(Br-PEG-Br)-g-(}\beta\text{-CD)}_2$  is 7280 nearly the theoretical value ( $M_w=7283$ ) and the chemical shift of 1,2,3-triazole ring can be clearly found at 7.9 ppm in Figure S2D. In addition, the characteristic chemical shift of PEG,  $\beta\text{-CD}$  and PDEA could be found in

Figure S2D, and the degree of polymerization (DP) of DEA was 57 tested by SEC-MALLS. Therefore, SEC-MALLS and  $^1\text{H}$ NMR results indicate that P1 was successfully synthesized.

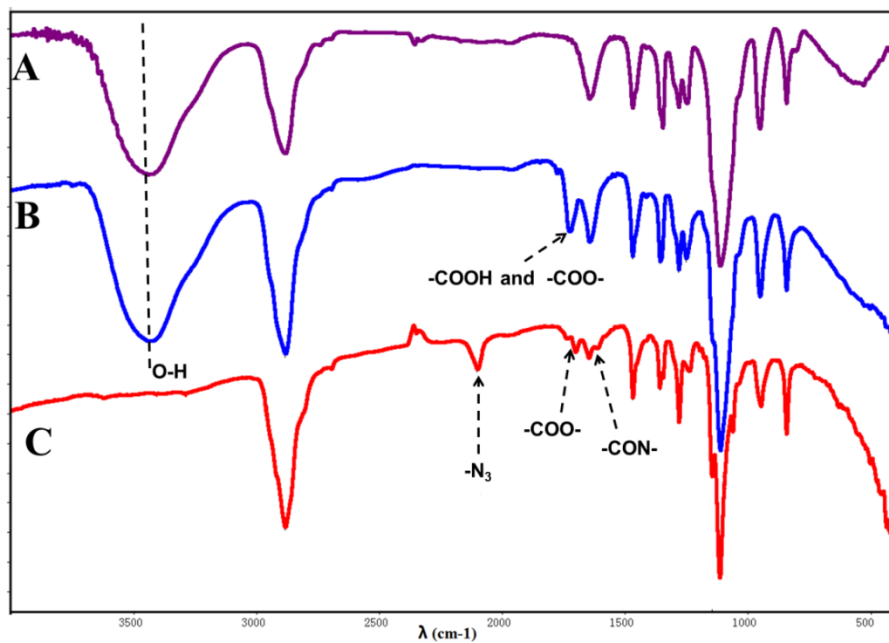

Figure S1 FT-IR spectra of HO-PEG-OH (A), HOOC-(Br-PEG-Br)-COOH(B) and  $(\text{N}_3)_2$ -(Br-PEG-Br)- $(\text{N}_3)_2$ (C)

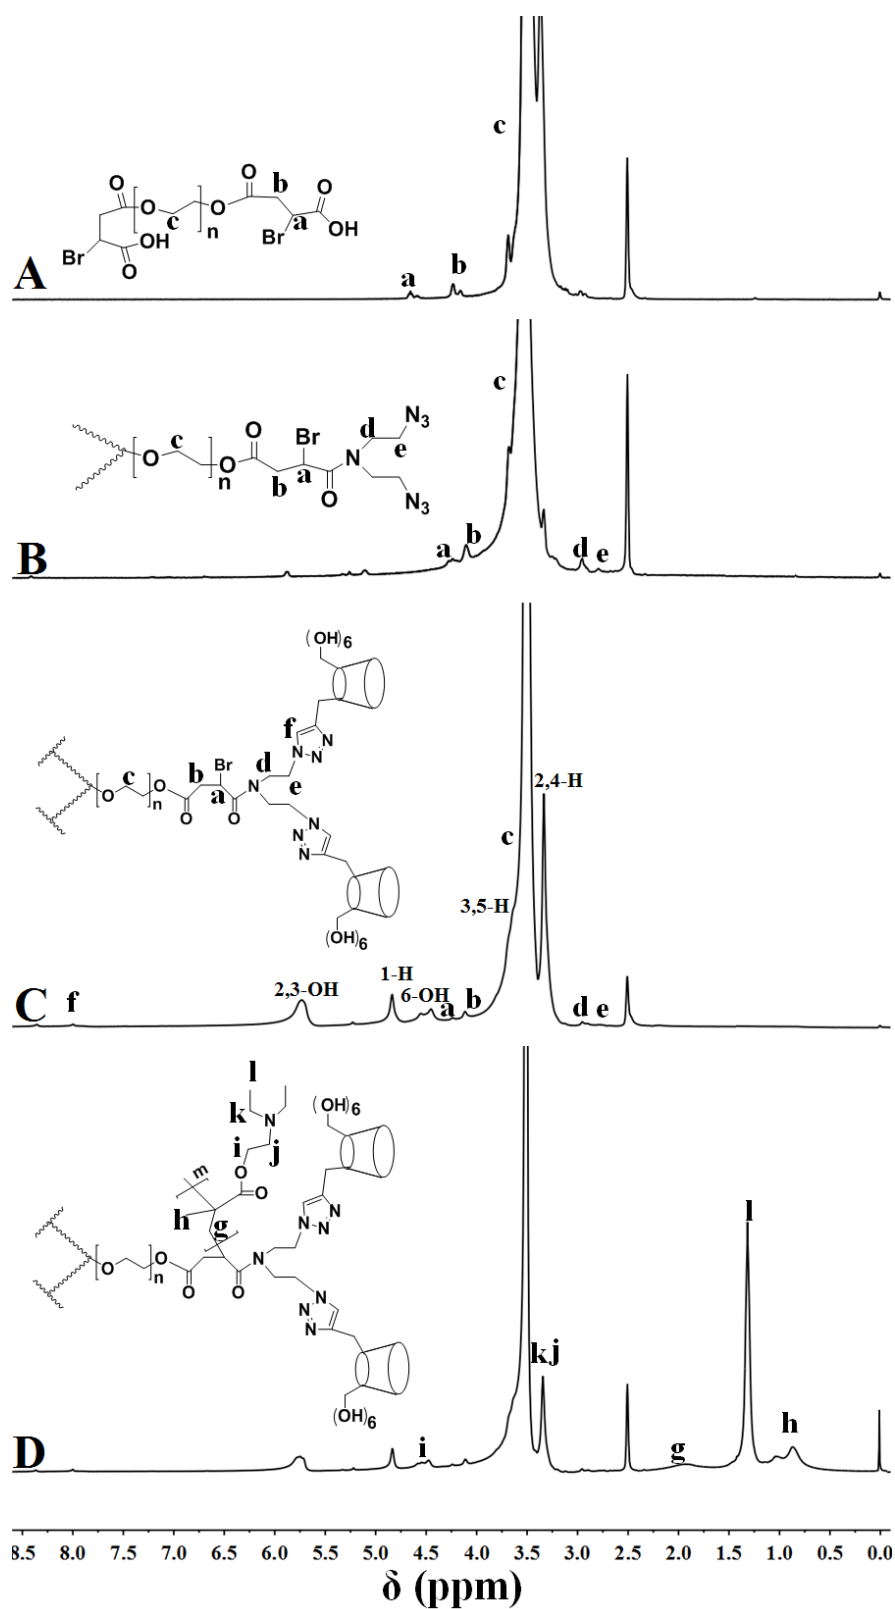

Figure S2  $^1\text{H}$  NMR spectra of  $\text{HOOC-(Br-PEG-Br)-COOH}$  (A),  $(\text{N}_3)_2\text{-(Br-PEG-Br)-}(\text{N}_3)_2$  (B),  $(\beta\text{-CD})_2\text{-g-(Br-PEG-Br)-g-(}\beta\text{-CD)}_2$  (C) and **P1** (D) in  $\text{DMSO-}d_6$  at  $25^\circ\text{C}$ .

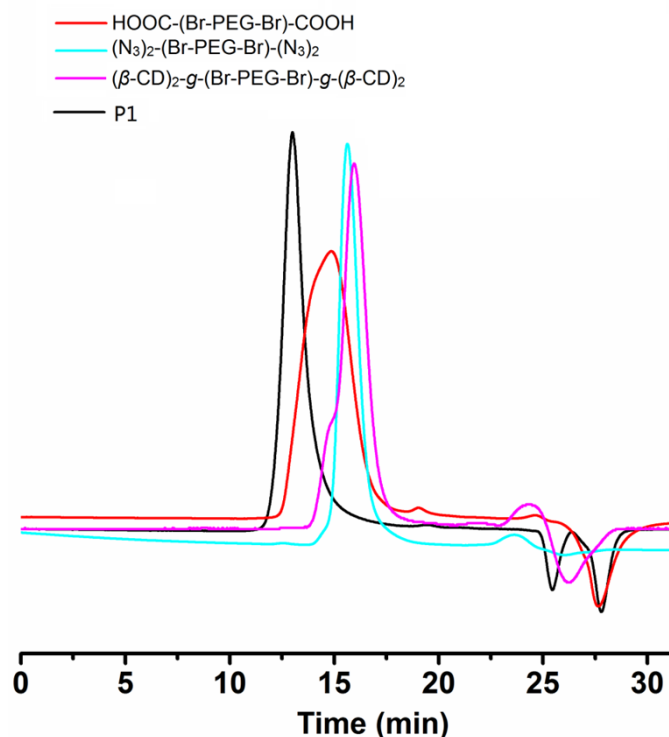

Figure S3 DRI signals of SEC-MALLS chromatograms of  $\text{HOOC}-(\text{Br-PEG-Br})-\text{COOH}$ ,  $(\text{N}_3)_2-(\text{Br-PEG-Br})-(\text{N}_3)_2$ ,  $(\beta\text{-CD})_2\text{-g}-(\text{Br-PEG-Br})\text{-g}-(\beta\text{-CD})_2$  and P1 ( $0.5\text{mg mL}^{-1}$ ).

Table S1 Molecular structure parameters of resulting polymers

| Polymers                                                                       | $M_w^b$ | $M_n^b$ | PDI <sup>c</sup> |
|--------------------------------------------------------------------------------|---------|---------|------------------|
| $\text{HOOC}-(\text{Br-PEG-Br})-\text{COOH}$                                   | 2370    | 2110    | 1.12             |
| $(\text{N}_3)_2-(\text{Br-PEG-Br})-(\text{N}_3)_2$                             | 2650    | 2250    | 1.18             |
| $(\beta\text{-CD})_2\text{-g}-(\text{Br-PEG-Br})\text{-g}-(\beta\text{-CD})_2$ | 7380    | 6110    | 1.21             |
| P1                                                                             | 22950   | 18090   | 1.26             |

### 3 Synthesis of and Characterization of P2

P2 was prepared via two-step reactions, as shown in Scheme S2.

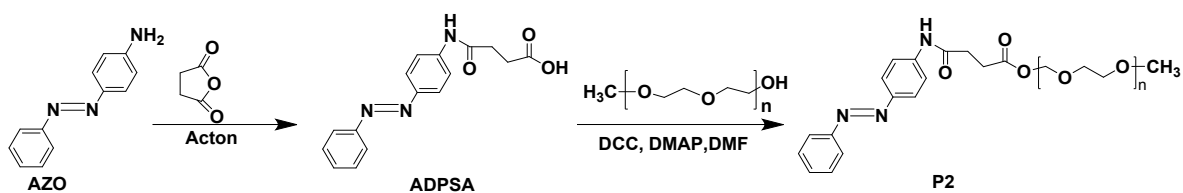

Scheme S2 Synthesis routes of P2

#### 3.1 Synthesis of N-4-azodiphenylsuccinic acid (ADPSA)



4-Aminoazobenzene (AZO, 19.7 g, 0.1 mol) in acetone was added drop-wise to a well stirred acetone solution of Succinic anhydride (10.0 g, 0.1 mol) in a round bottom flask. The entire reaction mixture was cooled externally. The orange solids of N-4-azodiphenylsuccinic acid (ADPSA) were filtered and dried at 25.0°C. ADPSA was purified by recrystallization from methanol. Yield: 90.3%, FT-IR(in  $\text{cm}^{-1}$ )(Figure S4A): 3277 (N-H), 1711 (-COOH),1642 (-CON-), 1548 and 1527(Ar).  $^1\text{H}$  NMR (Figure S5B) (400 MHz,  $\text{DMSO-}d_6$ , room temperature, TMS)  $\delta$  (ppm): 12.16 (-O-H), 10.38 (N-H), 7.91, 7.87 (4H, Ar-H), 7.57, 7.68( 4H, Ar-H), 2.68 (N- $\text{CH}_2$ -),2.61 (- $\text{CH}_2$ -COOH).

### 3.2 Synthesis of P2

ADPSA(0.594 g, 2mmol)andmPEG (2.00 g, 1.0 mmol) were dissolved in 6 ml DMFand treated with DCC(0.205g,1.0mmol) and DMAP (0.049g, 0.4 mmol) for 48 hours at roomtemperature.The dicyclohexylurea was filtered out andthe polymer was precipitated in ether, filtered and washedwithmethanol.The polymer was dried using a vacuumat20 °C for 24 h to give a yellowpowder.Yield: 67.2%.FT-IR (Figure S4B) ( $\text{cm}^{-1}$ ): 2873 ( $\text{CH}_2$ -O), 1721 (-COO-),1643  $\text{cm}^{-1}$ (-CON- ); 1549 (Ar),  $^1\text{H}$ -NMR (Figure S5A) (400 MHz, DMSO, room temperature, TMS)  $\delta$  (ppm): 7.89 and 7.78 (Ar-H), 3.87 (- $\text{OCH}_2\text{O}$ -), 2.51 (O- $\text{CH}_3$ ), 2.63-2.89 (- $\text{CH}_2$ -).

### 3.3 Characterization of P2

P2was synthesized via two-stepreactions (Scheme S2). The FT-IR and  $^1\text{H}$  NMR spectra of mPEG-AZO andADPSAwerepresented in Figure S4 and S5, and the characteristic signals of theazobenzene groupand mPEG moietieswere assigned clearly.

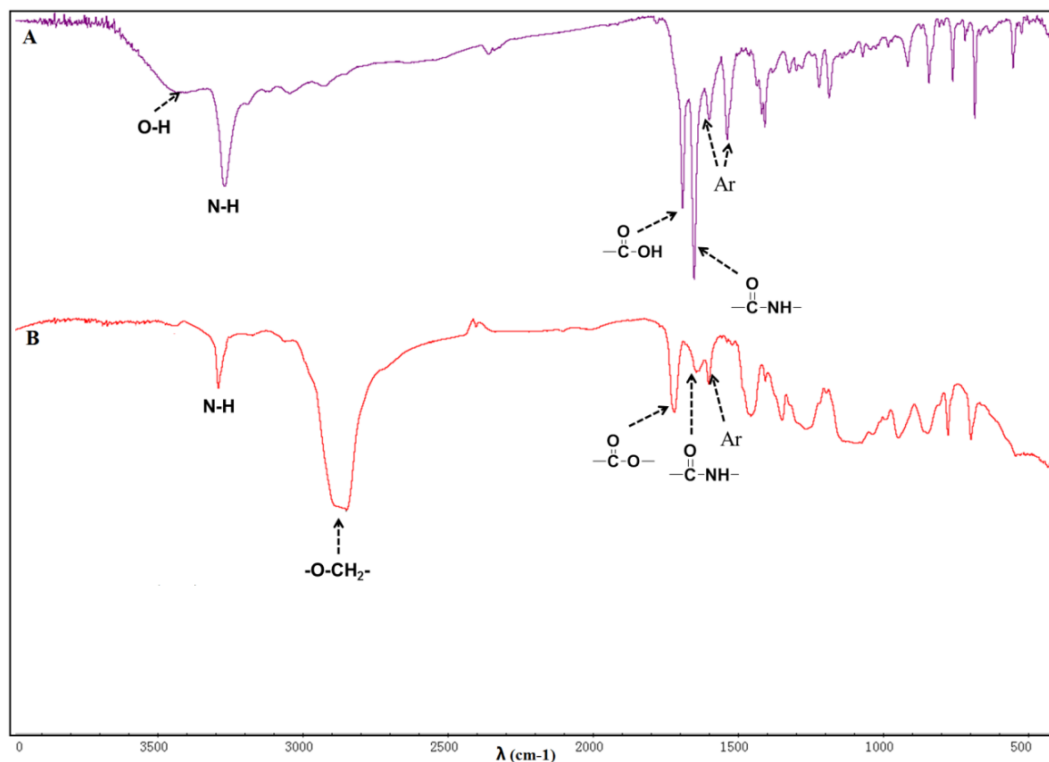

Figure S 4 FT-IR spectra of ADPSA(A) and P2(B)

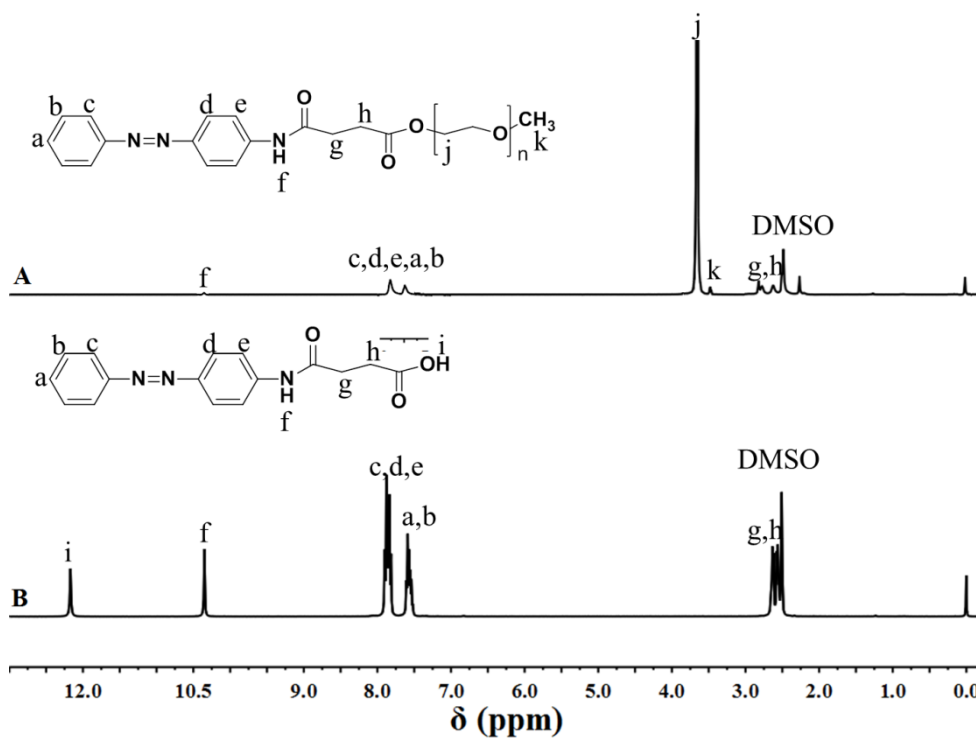

Figure S5  $^1\text{H}$ NMR spectra of P2 (A) and ADPSA (B) in  $\text{DMSO-}d_6$  at  $25^\circ\text{C}$ .

#### 4 Preparation of SBCP

The preparation of SBCP was based on the host-guest interaction between  $\beta$ -CD in P1 and Azo

in P2. In a typical experiment, P1 (2.295 mg, 0.1 mmol) was dissolved in pH 6.0 HCl (1.0 mL), and then equal volume of P2 (0.718 g, 0.4 mmol, dissolved in pH 6.0 HCl) solution was added dropwise with syringe into the solution at a rate of about one drop every 3 s with magnetic stirring.

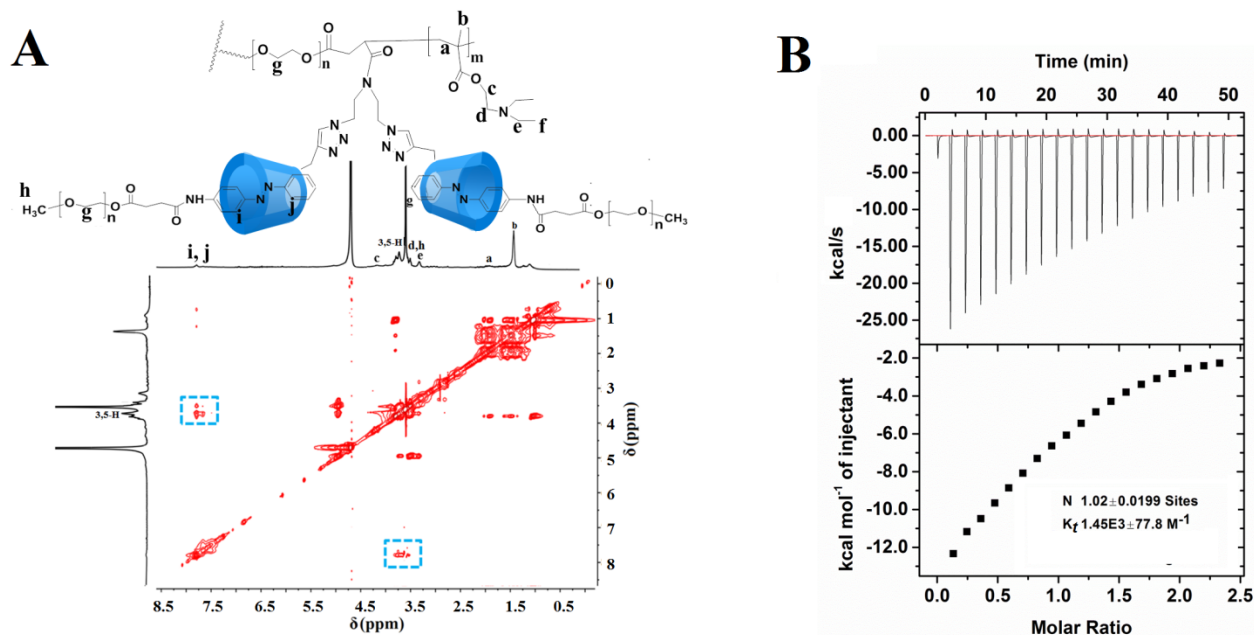

**Figure S6.** Formation of SBCP. (A) 2D  $^1\text{H}$  NMR NOESY spectra of mixed solutions of P1 (10 mM) and P2 (40 mM) in  $\text{D}_2\text{O}$  at pH 6.0 and 25  $^\circ\text{C}$ ; and (B) typical ITC curve that corresponds to the binding interaction of P1 (0.6 mM) with P2 (12.0 mM) in HCl solution at pH 6.0 and 25  $^\circ\text{C}$ .

The formation of SBCP in solution was determined by following UV absorption at 348 nm, which is the characteristic absorption of *t*Azo species, as shown in Fig S7. The concentration of P2 was kept at  $1.2 \times 10^{-5}$  M. Upon gradual addition of the P1 species, the absorption of P2 increased remarkably, and the absorbability increased to maximum after the ratio of P1/P2 increased to 1/4.

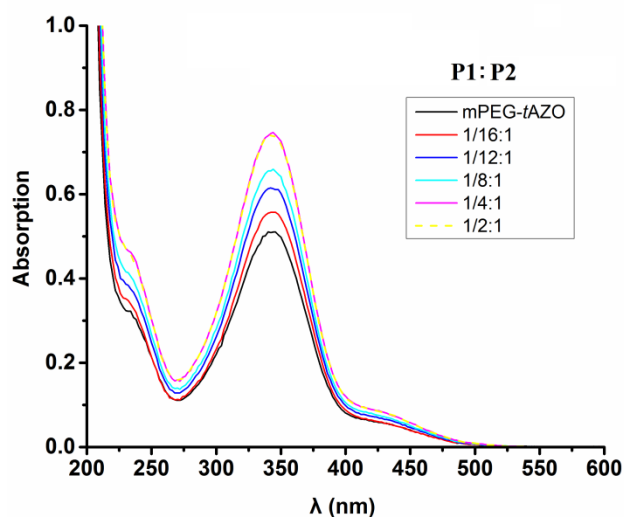

Figure S7 The UV absorption of P2 upon stepwise addition of P1 (the concentration of P2 keeps  $1.2 \times 10^{-5}$  M).

### 5 The dissociation process of SBCP

After 365 nm UV irradiation for 15 min, no correlation peaks between protons in the  $\beta$ -CD cavity and protons of the azobenzene moiety were observed (as shown in Figure S8A), indicating host-guest disassembly between the azobenzene moiety and  $\beta$ -CD. But the correlation peaks between protons in the  $\beta$ -CD cavity and protons of the azobenzene moiety were observed again after 15 min visible light irradiation as shown in Figure S8B. This result indicated the reversible formation process of SBCP.

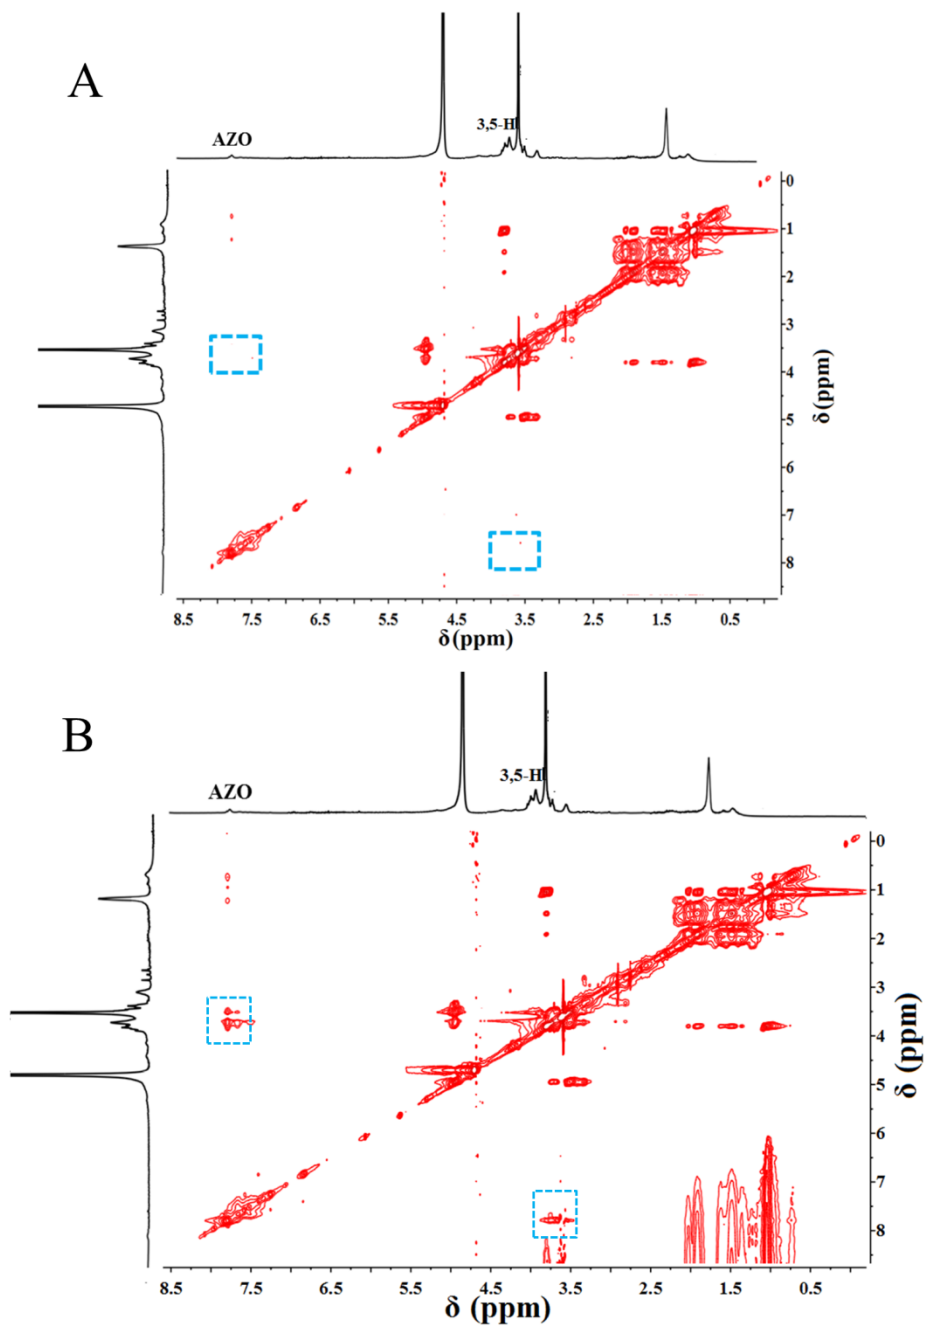

Figure S8 2DNOESY spectra of SBCP after 365 nm light irradiation for 15 min (A) and subsequently irradiated in visible light for 15 min (B) in D<sub>2</sub>O at pH 6.0 and 25 °C.

## 6 Formation of SBCP self-assemblies

After the pH was adjusted from pH 6.0 to 7.4 by 0.1M NaOH, the PDEA segments in P1 became hydrophobic for the deprotonation of tertiary amines. Thus, SBCP showed an amphiphilic property and could self-assemble into vesicles. In addition, the host-guest interactions between  $\beta$ -CD in P1 and Azo in P2 could be controlled by the alternating irradiation between 365 nm UV light and visible light. Therefore, the SBCP could be deconstructed and reconstructed under alternating UV and

visible light irradiation. Thus, the morphology of SBCP self-assemblies could be changed after the irradiation of UV and visible light.  $^1\text{H}$  NMR was used to confirm the formed vesicles (1.5 mg/ml).

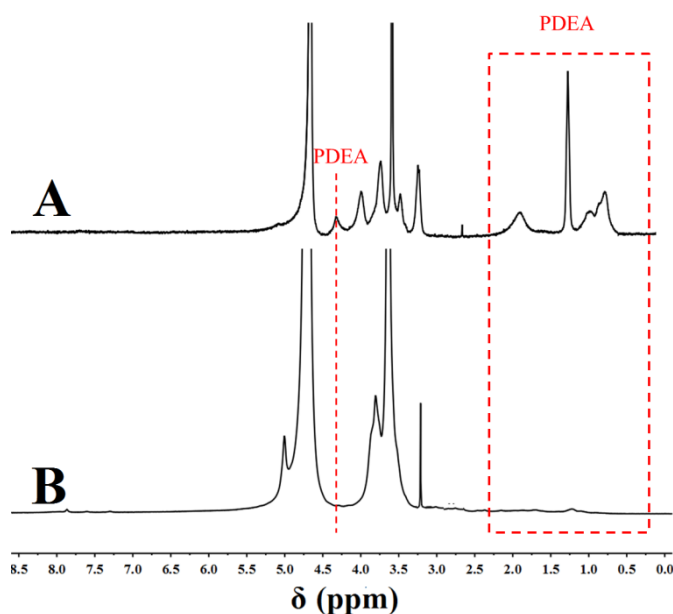

Figure S9  $^1\text{H}$  NMR spectra of SBCP self-assemblies at pH 6.0 (A) and 7.4 (B) in  $\text{D}_2\text{O}$  at 25 °C, respectively.

CAC of SBCP self-assemblies was estimated by a fluorescence spectroscopic method using pyrene as the fluorescence probe. Typically, pyrene solutions in acetone were added to each brown bottle. Acetone was then evaporated, leaving  $1.0 \times 10^{-8}$  mol of pyrene in each bottle. Aqueous solutions (10 mL) of SBCP at concentrations ranging from 1.2 mg/ml to 0.05 mg/ml were added to the bottles. The mixtures were stirred at 25 °C for 3 h. They were sonicated for 1 min before measurement. The spectroscopy measurement was carried out at the emission wavelength of 418 nm and excitation wavelength of 340 nm.<sup>[8]</sup>

The intensities of emission peaks at ca. 373 and 383 nm, denoted as  $I_1$  and  $I_3$ , respectively, are related to the polarity of the microenvironment in which pyrene is dissolved and the  $I_1/I_3$  ratio is, therefore, a very good indicator for the micellar solution.<sup>[9,10]</sup> The  $I_1/I_3$  ratio of pyrene as a function of concentration of SBCP is shown in Figure S10. It can be seen that  $I_1/I_3$  ratios was constant at low concentrations. Pyrene molecules are probably existed in aqueous environment at low concentrations because there are only single polymer chains present. However, the sudden decrease in  $I_1/I_3$  values at around 0.64 mg/ml of SBCP indicates a change in the polarity of the pyrene environment, which is probably due to some pyrene molecules entering into the more hydrophobic wall of the

vesicles. The estimated CAC value obtained from these fluorescence experiments is 0.64 mg/ml. Similarly, the CAC of P1 is 0.48 mg/mL, while P2 doesn't have CAC value, which indicated that P2 could not self-assemble into nanoparticles in this experiment.

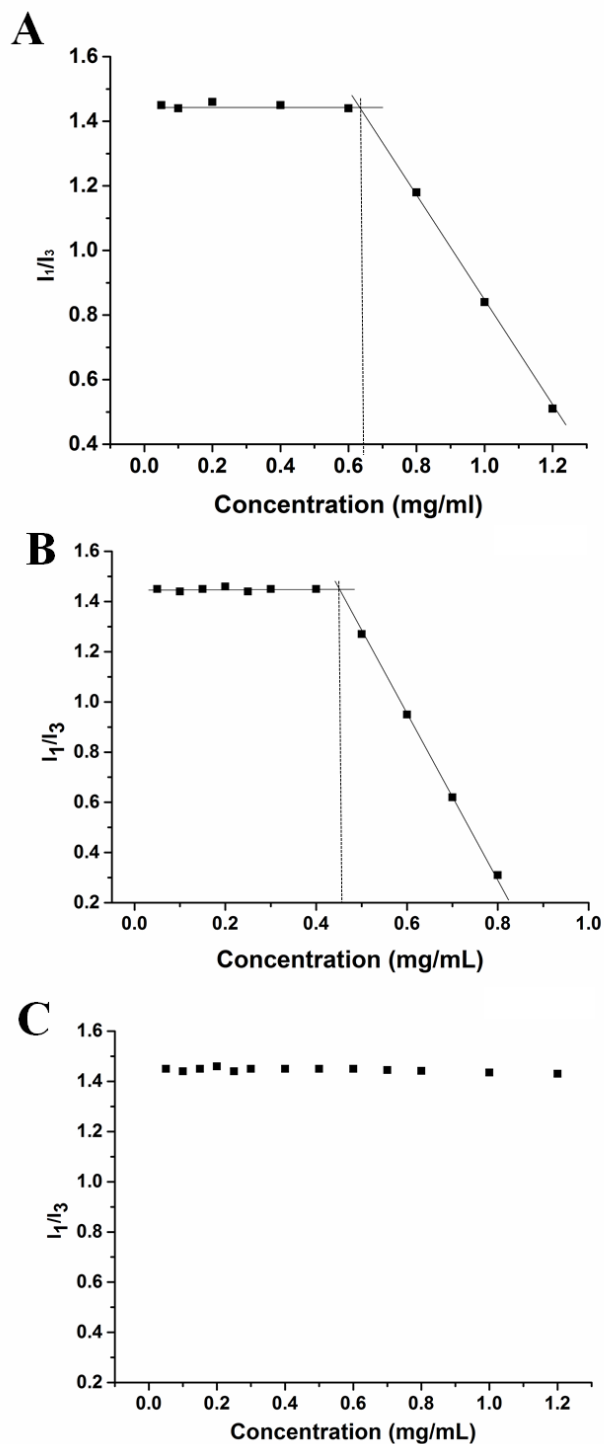

Figure S10 Plot of  $I_1/I_3$  in the excitation spectrum versus the concentrations of SBCP (A), P1(B) and P2 self-assemblies.

## 7 The influence of UV light irradiation on the reversible morphology transitions of SBCP self-assemblies

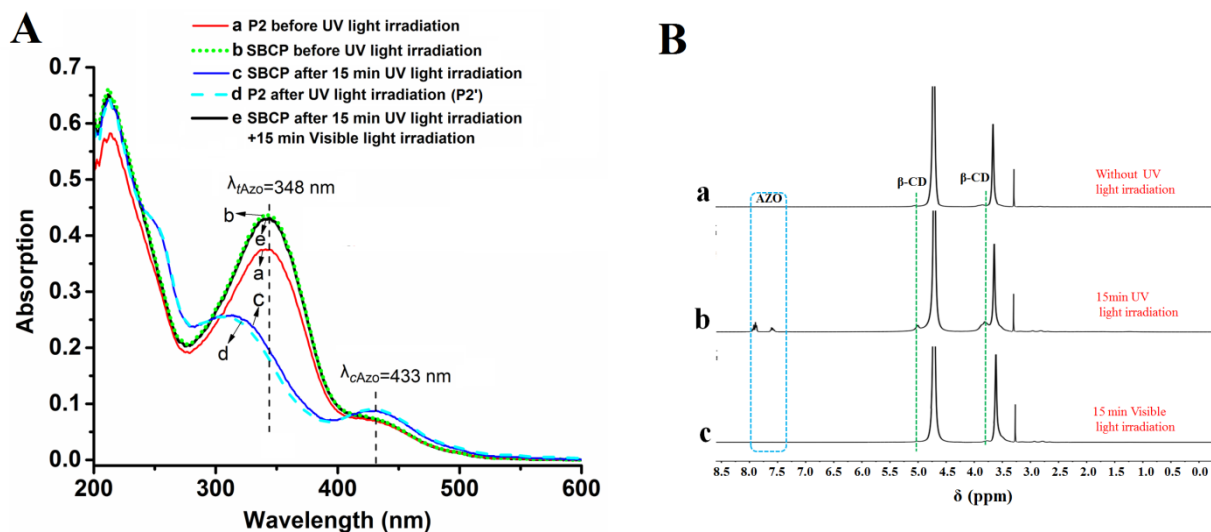

Figure S11. (A) UV-vis spectra of P2 before (a) and after (d) UV light irradiation and SBCP before (b) and after (c) UV and visible light (e) irradiation; (B)  $^1\text{H}$  NMR spectra of SBCP solution without UV light irradiation (a), after exposure to UV light for 15 min (b), and after exposure to visible light for 15 min (c) under pH 7.4 and 25 °C.

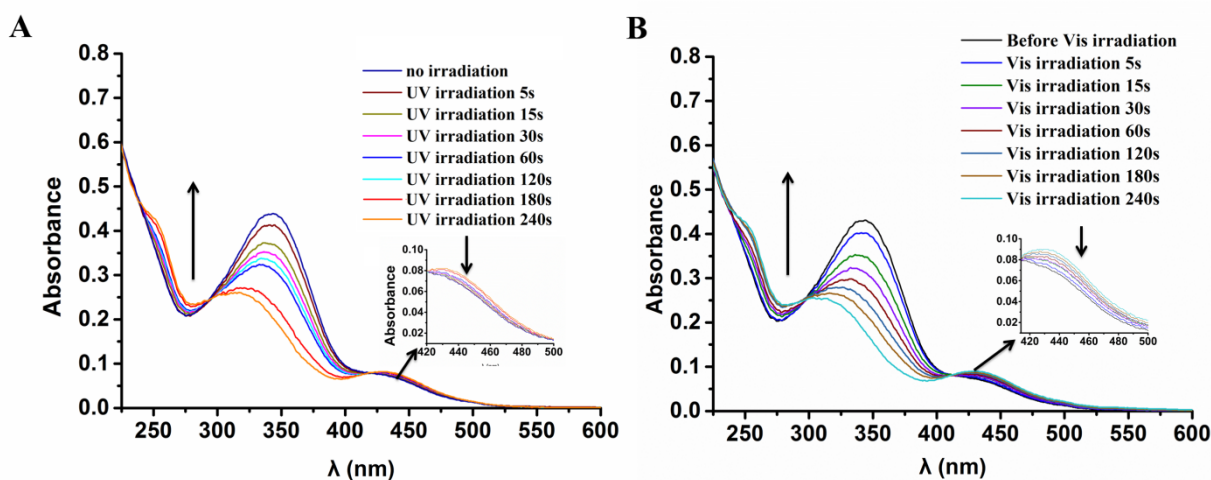

Figure S12 UV-Vis spectra of SBCP self-assemblies. (A) UV irradiation induced *trans*-to-*cis* transitions at 365 nm and (B) Visible light irradiation induced *cis*-to-*trans* transitions (The concentration of the sample is 0.1 mg mL<sup>-1</sup>)

## 8 Drug loading and in vitro release

The encapsulation and controlled release experiments of DOX were carried out according to the literature protocol<sup>[4,5]</sup> and modified as follows. SBCP (20.0 mg) and DOX • HCl (6.0 mg) were



dissolved in pH 6.0 HCl (10.0 mL) to make SBCP/DOX·HCl mixture solutions. Then 0.01M NaOH was dropwise added to the solution within 1.5 h to adjust the pH from 6.0 to 7.4, leading the formation of DOX-loaded vesicles and the mixture was stirred 2h to reach equilibration. The unloaded free drug and the salt produced by neutralization reaction were removed by dialysis using a dialysis tube (cut off  $M_n$  8000 - 14000) against 1000 mL pure water at 25°C with 300 r/min of stirring. Pure water was renewed for 6 times within 3 h (every 0.5 h). The final volume of vesicles/DOX aqueous solution was 45.6 mL and the drug loading efficiency of polymer vesicles was measured by UV spectroscopy after dialysis (the dialyzed solution was diluted to twice times by adding pure water before fluorescence measurement). The final DOX release process was carried out under the flowing three protocols: 1) Dialyzing 5.0 mL of DOX-loaded vesicles in the dialysis tube (cut off  $M_n=8000-14000$ ) against 100 mL pure water in dark and 37°C under one cycle of 365 nm UV light irradiation and visible light irradiation. 2) Dialyzing 5.0 mL of DOX-loaded vesicles in the dialysis tube (cut off  $M_n=8000-14000$ ) against 100 mL pure water in dark and 37°C under three cycles of 365 nm UV light irradiation and visible light irradiation. 3) Dialyzing 5.0 mL of DOX-loaded vesicles in the dialysis tube (cut off  $M_n=8000-14000$ ) against 100 mL pure water in dark and 37°C without any stimuli.

The drug loading efficiency (DLE) and drug loading content (DLC) were calculated according to the following equations.<sup>[6]</sup>

$$DLE(\%) = \frac{M_e}{M_f} \times 100\%$$

$$DLC(\%) = \frac{M_e}{M_p} \times 100\%$$

Where  $M_e$  is the weight of drug encapsulated in vesicles,  $M_f$  is the weight of drug in feed and  $M_p$  is the weight of polymer used.  $M_f=6$  mg,  $M_p=20$  mg.

## 9 Reference

- [1] C. G. Mu, X. D. Fan, W. Tian, Y. Bai, Z. Yang, H. Yao, J. Polym. Sci. Part A. 2013, 51, 1405-1416.
- [2] H. T. Zhang, X. D. Fan, W. Tian, R. T. Suo, Z. Yang, Y. Bai, W. B. Zhang, Chem. Eur. J. 2015, 21, 5000 -5008.
- [3] M. Licciardi, Y. Tang, N. C. Billingham, S. P. Armes, A. L. Lewis, Biomacromolecules. 2005, 6,1085-96.
- [4] T. B. Ren, Q. M. Liu, H. Lu, H. M. Liu, X. Zhang, J. Z. Du, J. Mater. Chem. 2012, 22, 12329-12338

- [5] J. Z. Du, L. Fan, Q. M. Liu, *Macromolecules*, 2012, 45, 8275-8283.
- [6] W. Q. Chen, J. Z. Du, *Scientific Reports*, 2013, 3,2162.
- [7] S. Daoud-Mahammed, P. Couvreur, K. Bouchemal, M. Chéron, G. Lebas, C. Amiel, R. Gref, *Biomacromolecules*, 2009, 10, 547,
- [8] Ö. Topel, B.A. Çakır, L. Budama, N. Hoda, *J. Mol. Liq.* 2013, 177, 40–43.
- [9] K. Kataoka, A. Harada, Y. Nagasaki, *Adv. Drug Delivery Rev.* 2001,47, 113–131.
- [10] G. Gaucher, M. H. Dufresnea, V.P. Sant, N. Kang, D. Maysinger, J.C. Leroux, *J. Control. Release*, 2005,109,169–188.
